# Supplementary material for: Comparison of Secular Trends in Esophageal Cancer Mortality in China and Japan during 1990–2019: An Age-Period-Cohort Analysis
Source: MDPI journal article supplement (doi:10.3390/ijerph191610302), 2022-08-18
Supplement: s1 [file s1]

## Supplementary Materials

**Table S1.** Mortality rate of esophageal cancer by age, period, and median birth cohorts among men in China, 1990 to 2019 (per 100 000)

[illegible]

**Table S2.** Mortality rate of esophageal cancer by age, period, and median birth cohorts among women in China, 1990 to 2019 (per 100 000)

| Median period | Age group |       |       |       |       |       |       |       |       |        |        |        | Median birth cohort |
|---------------|-----------|-------|-------|-------|-------|-------|-------|-------|-------|--------|--------|--------|---------------------|
|               | 25-29     | 30-34 | 35-39 | 40-44 | 45-49 | 50-54 | 55-59 | 60-64 | 65-69 | 70-74  | 75-79  | 80-84  |                     |
| China(female) |           |       |       |       |       |       |       |       |       |        |        | 149.13 | 1912                |
|               |           |       |       |       |       |       |       |       |       |        | 139.72 | 143.00 | 1917                |
|               |           |       |       |       |       |       |       |       |       | 115.01 | 134.17 | 164.54 | 1922                |
|               |           |       |       |       |       |       |       |       | 81.24 | 109.82 | 144.45 | 154.88 | 1927                |
|               |           |       |       |       |       |       |       | 48.09 | 71.84 | 108.79 | 116.72 | 113.32 | 1932                |
|               |           |       |       |       |       |       | 26.59 | 41.08 | 71.28 | 84.77  | 79.64  | 87.00  | 1937                |
|               |           |       |       |       |       | 12.22 | 19.47 | 42.75 | 52.93 | 55.67  | 64.86  |        | 1942                |
|               |           |       |       |       | 4.90  | 12.21 | 23.65 | 34.26 | 35.52 | 47.11  |        |        | 1947                |
|               |           |       |       | 2.43  | 6.23  | 13.06 | 17.96 | 19.82 | 25.67 |        |        |        | 1952                |
|               |           |       | 0.76  | 2.43  | 5.70  | 8.87  | 9.37  | 13.90 |       |        |        |        | 1957                |
|               |           | 0.31  | 0.74  | 2.21  | 3.03  | 3.83  | 6.41  |       |       |        |        |        | 1962                |
|               | 0.15      | 0.46  | 0.76  | 1.58  | 1.78  | 2.71  |       |       |       |        |        |        | 1967                |
| 1992          | 0.24      | 0.39  | 0.54  | 0.79  | 1.18  |       |       |       |       |        |        |        | 1972                |
| 1997          | 0.19      | 0.22  | 0.30  | 0.55  |       |       |       |       |       |        |        |        | 1977                |
| 2002          | 0.11      | 0.14  | 0.23  |       |       |       |       |       |       |        |        |        | 1982                |
| 2007          | 0.08      | 0.11  |       |       |       |       |       |       |       |        |        |        | 1987                |
| 2012          | 0.06      |       |       |       |       |       |       |       |       |        |        |        | 1992                |
| 2017          |           |       |       |       |       |       |       |       |       |        |        |        |                     |

**Table S3.** Mortality rate of esophageal cancer by age, period, and median birth cohorts among men in Japan, 1990 to 2019 (per 100 000)

| Median period | Age group |       |       |       |       |       |       |       |       |       |       |       | Median birth cohort |
|---------------|-----------|-------|-------|-------|-------|-------|-------|-------|-------|-------|-------|-------|---------------------|
|               | 25-29     | 30-34 | 35-39 | 40-44 | 45-49 | 50-54 | 55-59 | 60-64 | 65-69 | 70-74 | 75-79 | 80-84 |                     |
| Japan(male)   |           |       |       |       |       |       |       |       |       |       |       | 87.15 | 1912                |
|               |           |       |       |       |       |       |       |       |       |       | 74.38 | 83.47 | 1917                |
|               |           |       |       |       |       |       |       |       |       | 61.35 | 72.40 | 80.46 | 1922                |
|               |           |       |       |       |       |       |       |       | 50.25 | 60.76 | 72.48 | 80.14 | 1927                |
|               |           |       |       |       |       |       |       | 38.31 | 51.53 | 62.67 | 74.05 | 81.91 | 1932                |
|               |           |       |       |       |       |       | 24.36 | 36.96 | 50.26 | 61.08 | 70.70 | 76.83 | 1937                |
|               |           |       |       |       |       | 12.18 | 23.49 | 36.37 | 49.07 | 58.53 | 65.88 |       | 1942                |
|               |           |       |       |       | 5.27  | 12.63 | 23.73 | 35.54 | 46.26 | 56.32 |       |       | 1947                |
|               |           |       |       | 1.50  | 5.10  | 11.48 | 20.96 | 30.79 | 39.93 |       |       |       | 1952                |
|               |           |       | 0.32  | 1.35  | 4.42  | 9.57  | 17.08 | 25.72 |       |       |       |       | 1957                |
|               |           | 0.09  | 0.28  | 1.20  | 3.48  | 7.63  | 14.31 |       |       |       |       |       | 1962                |
|               | 0.03      | 0.09  | 0.26  | 0.98  | 2.64  | 6.10  |       |       |       |       |       |       | 1967                |
| 1992          | 0.03      | 0.09  | 0.22  | 0.82  | 2.19  |       |       |       |       |       |       |       | 1972                |
| 1997          | 0.03      | 0.08  | 0.21  | 0.73  |       |       |       |       |       |       |       |       | 1977                |
| 2002          | 0.02      | 0.07  | 0.19  |       |       |       |       |       |       |       |       |       | 1982                |
| 2007          | 0.02      | 0.07  |       |       |       |       |       |       |       |       |       |       | 1987                |
| 2012          | 0.02      |       |       |       |       |       |       |       |       |       |       |       | 1992                |
| 2017          |           |       |       |       |       |       |       |       |       |       |       |       |                     |

**Table S4.** Mortality rate of esophageal cancer by age, period, and median birth cohorts among women in Japan, 1990 to 2019 (per 100 000)

| Median period | Age group |       |       |       |       |       |       |       |       |       |       |       | Median birth cohort |
|---------------|-----------|-------|-------|-------|-------|-------|-------|-------|-------|-------|-------|-------|---------------------|
|               | 25-29     | 30-34 | 35-39 | 40-44 | 45-49 | 50-54 | 55-59 | 60-64 | 65-69 | 70-74 | 75-79 | 80-84 |                     |
| Japan(female) |           |       |       |       |       |       |       |       |       |       |       | 21.72 | 1912                |
|               |           |       |       |       |       |       |       |       |       |       | 14.05 | 18.05 | 1917                |
|               |           |       |       |       |       |       |       |       |       | 8.43  | 11.57 | 14.91 | 1922                |
|               |           |       |       |       |       |       |       |       | 5.24  | 6.93  | 9.52  | 12.68 | 1927                |
|               |           |       |       |       |       |       |       | 3.54  | 4.68  | 6.45  | 8.55  | 11.67 | 1932                |
|               |           |       |       |       |       |       | 2.42  | 3.61  | 4.73  | 6.38  | 8.36  | 11.05 | 1937                |
|               |           |       |       |       |       | 1.38  | 2.54  | 3.83  | 4.71  | 6.30  | 8.23  |       | 1942                |
|               |           |       |       |       | 0.64  | 1.54  | 2.71  | 3.77  | 4.81  | 6.28  |       |       | 1947                |
|               |           |       |       | 0.27  | 0.69  | 1.64  | 2.70  | 3.69  | 4.60  |       |       |       | 1952                |
|               |           |       | 0.09  | 0.28  | 0.68  | 1.63  | 2.48  | 3.44  |       |       |       |       | 1957                |
|               |           | 0.03  | 0.09  | 0.28  | 0.69  | 1.57  | 2.30  |       |       |       |       |       | 1962                |
|               | 0.02      | 0.03  | 0.09  | 0.29  | 0.66  | 1.49  |       |       |       |       |       |       | 1967                |
| 1992          | 0.02      | 0.03  | 0.09  | 0.29  | 0.63  |       |       |       |       |       |       |       | 1972                |
| 1997          | 0.02      | 0.03  | 0.08  | 0.28  |       |       |       |       |       |       |       |       | 1977                |
| 2002          | 0.02      | 0.03  | 0.08  |       |       |       |       |       |       |       |       |       | 1982                |
| 2007          | 0.01      | 0.02  |       |       |       |       |       |       |       |       |       |       | 1987                |
| 2012          | 0.01      |       |       |       |       |       |       |       |       |       |       |       | 1992                |
| 2017          |           |       |       |       |       |       |       |       |       |       |       |       |                     |

**Table S5.** Estimated coefficients for age, period, and cohort effects on esophageal cancer mortality.

| Factor        | China       |                    |             |                | Japan       |                |             |                |
|---------------|-------------|--------------------|-------------|----------------|-------------|----------------|-------------|----------------|
|               | Men         |                    | Women       |                | Men         |                | Women       |                |
|               | Coefficient | 95%CI <sup>a</sup> | Coefficient | 95%CI          | Coefficient | 95%CI          | Coefficient | 95%CI          |
| <b>Age</b>    |             |                    |             |                |             |                |             |                |
| 25-29         | -1.21       | -1.45 to -0.97     | -0.21       | -0.56 to 0.14  | -1.10       | -1.37 to -0.83 | -0.69       | -1.05 to -0.33 |
| 30-34         | -0.48       | -0.64 to -0.33     | -0.21       | -0.49 to 0.08  | -0.64       | -0.82 to -0.46 | -0.74       | -1.03 to -0.44 |
| 35-39         | 0.02        | -0.09 to 0.13      | -0.28       | -0.51 to -0.05 | -0.35       | -0.49 to -0.22 | -0.23       | -0.44 to -0.03 |
| 40-44         | 0.59        | 0.50 to 0.67       | 0.06        | -0.11 to 0.23  | 0.35        | 0.26 to 0.44   | 0.34        | 0.19 to 0.49   |
| 45-49         | 0.66        | 0.59 to 0.73       | 0.19        | 0.05 to 0.32   | 0.81        | 0.74 to 0.88   | 0.59        | 0.48 to 0.71   |
| 50-54         | 0.70        | 0.65 to 0.75       | 0.30        | 0.20 to 0.41   | 0.97        | 0.92 to 1.02   | 0.83        | 0.75 to 0.92   |
| 55-59         | 0.61        | 0.57 to 0.65       | 0.29        | 0.21 to 0.37   | 0.93        | 0.90 to 0.97   | 0.73        | 0.67 to 0.79   |
| 60-64         | 0.41        | 0.38 to 0.44       | 0.31        | 0.25 to 0.36   | 0.69        | 0.67 to 0.71   | 0.48        | 0.44 to 0.52   |
| 65-69         | 0.15        | 0.13 to 0.17       | 0.22        | 0.18 to 0.26   | 0.32        | 0.31 to 0.33   | 0.13        | 0.10 to 0.16   |
| 70-74         | -0.10       | -0.12 to -0.07     | 0.07        | 0.03 to 0.12   | -0.14       | -0.16 to -0.12 | -0.17       | -0.21 to -0.14 |
| 75-79         | -0.47       | -0.51 to -0.43     | -0.21       | -0.27 to -0.14 | -0.64       | -0.68 to -0.60 | -0.48       | -0.54 to -0.42 |
| 80-84         | -0.87       | -0.93 to -0.82     | -0.54       | -0.63 to -0.45 | -1.19       | -1.25 to -1.14 | -0.80       | -0.88 to -0.72 |
| <b>Period</b> |             |                    |             |                |             |                |             |                |
| 1990-1994     | -0.08       | -0.09 to -0.06     | -0.11       | -0.14 to -0.08 | -0.02       | -0.03 to -0.01 | -0.02       | -0.04 to 0.00  |
| 1995-1999     | -0.05       | -0.07 to -0.03     | -0.04       | -0.08 to -0.01 | 0.01        | 0.00 to 0.02   | 0.00        | -0.02 to 0.02  |
| 2000-2004     | 0.12        | 0.10 to 0.14       | 0.17        | 0.13 to 0.20   | 0.02        | 0.01 to 0.03   | 0.02        | 0.00 to 0.04   |
| 2005-2009     | 0.11        | 0.10 to 0.13       | 0.14        | 0.10 to 0.17   | 0.01        | 0.01 to 0.02   | 0.02        | 0.00 to 0.04   |
| 2010-2014     | -0.02       | -0.04 to -0.01     | -0.07       | -0.11 to -0.03 | 0.00        | -0.01 to 0.00  | 0.01        | -0.01 to 0.03  |
| 2015-2019     | -0.09       | -0.10 to -0.07     | -0.08       | -0.12 to -0.05 | -0.01       | -0.02 to -0.01 | -0.02       | -0.04 to -0.01 |
| <b>Cohort</b> |             |                    |             |                |             |                |             |                |
| 1910-1914     | -0.31       | -0.44 to -0.19     | -0.66       | -0.87 to -0.46 | -0.28       | -0.37 to -0.19 | 0.45        | 0.32 to 0.58   |
| 1915-1919     | -0.18       | -0.26 to -0.11     | -0.44       | -0.59 to -0.29 | -0.24       | -0.31 to -0.17 | 0.30        | 0.20 to 0.41   |
| 1920-1924     | -0.08       | -0.14 to -0.03     | -0.24       | -0.35 to -0.13 | -0.19       | -0.25 to -0.14 | 0.12        | 0.04 to 0.20   |
| 1925-1930     | -0.02       | -0.06 to 0.02      | -0.06       | -0.15 to 0.02  | -0.11       | -0.15 to -0.07 | -0.04       | -0.10 to 0.02  |
| 1931-1934     | 0.00        | -0.04 to 0.03      | 0.03        | -0.03 to 0.09  | 0.00        | -0.02 to 0.03  | -0.12       | -0.16 to -0.07 |
| 1935-1939     | 0.02        | -0.01 to 0.04      | 0.09        | 0.05 to 0.14   | 0.06        | 0.05 to 0.08   | -0.11       | -0.14 to -0.08 |
| 1940-1944     | 0.03        | 0.01 to 0.05       | 0.12        | 0.07 to 0.17   | 0.12        | 0.11 to 0.13   | -0.08       | -0.11 to -0.05 |
| 1945-1949     | 0.10        | 0.08 to 0.13       | 0.20        | 0.14 to 0.27   | 0.19        | 0.17 to 0.20   | -0.04       | -0.08 to 0.00  |
| 1950-1954     | 0.13        | 0.09 to 0.16       | 0.22        | 0.13 to 0.31   | 0.16        | 0.13 to 0.19   | -0.01       | -0.07 to 0.04  |
| 1955-1959     | 0.11        | 0.07 to 0.16       | 0.17        | 0.05 to 0.28   | 0.10        | 0.06 to 0.15   | -0.01       | -0.09 to 0.07  |
| 1960-1964     | 0.02        | -0.04 to 0.08      | -0.01       | -0.17 to 0.15  | 0.01        | -0.05 to 0.07  | 0.00        | -0.11 to 0.10  |
| 1965-1969     | 0.00        | -0.07 to 0.07      | -0.06       | -0.25 to 0.12  | -0.12       | -0.19 to -0.04 | 0.04        | -0.09 to 0.16  |

| Factor    | China       |                    |             |               | Japan       |                |             |               |
|-----------|-------------|--------------------|-------------|---------------|-------------|----------------|-------------|---------------|
|           | Men         |                    | Women       |               | Men         |                | Women       |               |
|           | Coefficient | 95%CI <sup>a</sup> | Coefficient | 95%CI         | Coefficient | 95%CI          | Coefficient | 95%CI         |
| 1970-1974 | -0.11       | -0.20 to -0.02     | -0.09       | -0.33 to 0.15 | -0.18       | -0.28 to -0.09 | 0.04        | -0.12 to 0.20 |
| 1975-1979 | -0.18       | -0.31 to -0.05     | -0.14       | -0.50 to 0.21 | -0.10       | -0.23 to 0.04  | 0.09        | -0.13 to 0.30 |
| 1980-1984 | -0.07       | -0.28 to 0.15      | -0.15       | -0.73 to 0.42 | -0.04       | -0.29 to 0.20  | 0.04        | -0.34 to 0.42 |
| 1985-1989 | 0.02        | -0.35 to 0.39      | -0.20       | -1.06 to 0.67 | 0.02        | -0.43 to 0.46  | 0.01        | -0.70 to 0.71 |
| 1990-1994 | 0.00        | -0.85 to 0.86      | -0.18       | -1.75 to 1.40 | 0.02        | -1.02 to 1.06  | -0.03       | -1.36 to 1.31 |

Note: <sup>a</sup>95%CI is the abbreviation of the 95% confidence interval

**Table S6.** Wald Chi-Square tests for estimable functions in the APC model.

| Null Hypothesis                     | China      |         |            |         | Japan      |         |            |         |
|-------------------------------------|------------|---------|------------|---------|------------|---------|------------|---------|
|                                     | Males      |         | Females    |         | Males      |         | Females    |         |
|                                     | Chi-Square | P-Value | Chi-Square | P-Value | Chi-Square | P-Value | Chi-Square | P-Value |
| <b>Net Drift = 0</b>                | 255.54     | <0.001  | 336.56     | <0.001  | 187.00     | <0.001  | 5.48       | <0.05   |
| <b>All Period RR = 1</b>            | 720.65     | <0.001  | 535.94     | <0.001  | 247.71     | <0.001  | 17.53      | <0.05   |
| <b>All Cohort RR = 1</b>            | 1039.21    | <0.001  | 1661.84    | <0.001  | 2863.68    | <0.001  | 918.86     | <0.001  |
| <b>All Local Drifts = Net Drift</b> | 130.99     | <0.001  | 126.40     | <0.001  | 1289.38    | <0.001  | 415.24     | <0.001  |

Notes: Net drifts refer to the overall annual percentage change in the age-standardized rate. Local drifts reflect the annual percentage change of age-specific mortality. All net drifts and local drifts were statistically significant ( $p < 0.05$ )
